# Supplementary material for: Diagnostic Value of Middle Meatal Cultures versus Maxillary Sinus Culture in Acute and Chronic Sinusitis: A Systematic Review and Meta-Analysis
Source: MDPI journal article supplement (doi:10.3390/jcm11206069), 2022-10-14
Supplement: s1 [file s1]

# Supplementary Materials

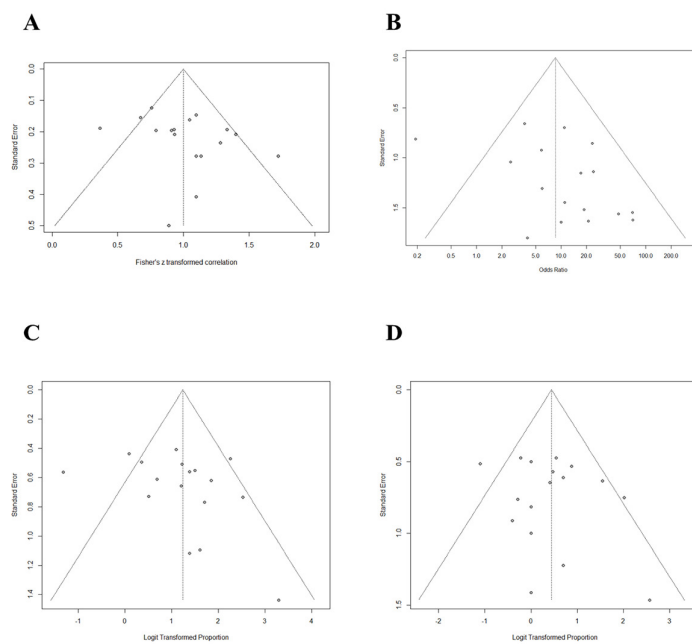

**Figure S1.** Begg funnel plots. Correlations between (A) middle meatus and maxillary sinus culture results. (B) Diagnostic odds ratio of middle meatus culture. (C) Sensitivity values. (D) Specificity values.

**Table S1.** Characteristics of the included studies.

| Study                             | Number of Patients | Age, Median (Range) or Mean(SD), y | Age Group | Sex (Male/Female) | Nationality | Rhinosinusitis | Patient Conditions | Harvest Method          | Isolate Number | Reference Test | r      | TP | FN | FP | TN |
|-----------------------------------|--------------------|------------------------------------|-----------|-------------------|-------------|----------------|--------------------|-------------------------|----------------|----------------|--------|----|----|----|----|
| Gold 1997                         | 18                 | 47 (25–72)                         | Adult     | 9/9               | USA         | Chronic        | OP                 | suction tip             | 21             | MS aspiration  | 0.857  | 13 | 0  | 2  | 6  |
| Klossek 1998                      | 533                | 42                                 | Adult     | 300/233           | France      | Chronic        | OP                 | swab                    | 68             | MS aspiration  | 0.64   | 48 | 5  | 7  | 8  |
| Ferguson 1999                     | 12                 | NA                                 | Adult     | NA                | USA         | Acute          | OPD                | suction tip             | 9              | MS aspiration  | 0.8    | 5  | 1  | 1  | 2  |
| Vogan 2000                        | 13                 | 44 (25–81)                         | Adult     | NA                | USA         | Acute          | OPD                | swab                    | 16             | MS aspiration  | 0.938  | 11 | 2  | 1  | 2  |
| Talbot 2001                       | 46                 | 37.6 (24–75)                       | Adult     | 27/26             | USA         | Acute          | OPD                | swab                    | 45             | MS aspiration  | 0.587  | 17 | 5  | 11 | 12 |
| Casiano 2001                      | 20                 | 40 (23–77)                         | Adult     | 17/3              | USA         | Acute          | Febrile ICU        | tissue culture (biopsy) | 29             | MS aspiration  | 0.72   | 19 | 3  | 5  | 2  |
| Kountakis 2002                    | 18                 | 50 (16–72)                         | Adult     | 12/6              | Greece      | Acute          | Febrile ICU        | swab                    | 31             | MS lavage      | 0.35   | 4  | 15 | 7  | 5  |
| Joniau 2005                       | 24                 | NA                                 | Adult     | NA                | Belgium     | Acute          | OPD                | glass micropipette      | 26             | MS aspiration  | 0.885  | 16 | 4  | 0  | 6  |
| Kirtsreesakul 2005                | 16                 | 44±17                              | Adult     | 8/7               | Thailand    | Chronic        | OP                 | aspiration instrument   | 16             | MS aspiration  | 0.8125 | 8  | 4  | 1  | 3  |
| Benninger 2006 (SAHP)             | 7                  | 41.3                               | Adult     | 5/2               | USA         | Acute          | OPD                | swab                    | 7              | MS aspiration  | 0.71   | 4  | 1  | 1  | 1  |
| Benninger 2006 (unpublished data) | 26                 | NA                                 | Adult     | NA                | USA         | Acute          | OPD                | suction tip             | 26             | MS aspiration  | 0.731  | 5  | 3  | 4  | 14 |
| Araujo 2007                       | 16                 | NA                                 | Adult     | NA                | Brazil      | Chronic        | OPD                | suction tip             | 16             | MS aspiration  | 0.8    | 10 | 3  | 0  | 3  |
| Hsin 2008                         | 21                 | 6.4 (2–12)                         | Children  | 12/9              | Taiwan      | Chronic        | OPD                | swab                    | 41             | MS aspiration  | 0.78   | 24 | 8  | 1  | 8  |
| Hsin 2010                         | 15                 | 5.9 (3–11)                         | Children  | 9/6               | Taiwan      | Chronic        | OPD                | swab                    | 29             | MS aspiration  | 0.66   | 11 | 10 | 0  | 8  |
| Hsin 2010                         | 16                 | 7.5 (4–10)                         | Children  | 10/6              | Taiwan      | Chronic        | OPD                | suction tip             | 30             | MS aspiration  | 0.87   | 18 | 4  | 0  | 8  |
| Thunberg 2013                     | 30                 | 45 (21–81)                         | Adult     | 6/24              | Sweden      | Acute          | OPD                | swab                    | 30             | MS aspiration  | 0.73   | 10 | 7  | 1  | 12 |
| Szaleniec 2021                    | 50                 | 49 (19–83)                         | Adult     | 25/25             | Poland      | Chronic        | OP                 | swab                    | 50             | MS swab        | 0.8    | 25 | 2  | 8  | 15 |

Abbreviations: NA, Not available; MS, maxillary sinus; OP, Operation; OPD, Outpatient department; ICU, Intensive care unit; TP, True positive; FP, False positive; FN, False Negative; TN, True negative.

**Table S2.** Methodological quality of the studies.

| Reference          | Risk of Bias      |            |                    |                 | Concerns about Application |            |                    |
|--------------------|-------------------|------------|--------------------|-----------------|----------------------------|------------|--------------------|
|                    | Patient Selection | Index Test | Reference Standard | Flow and Timing | Patient Selection          | Index Test | Reference Standard |
| Gold 1997          | Low               | Low        | Unclear            | Unclear         | Low                        | Low        | Low                |
| Klossek 1998       | Low               | Low        | Low                | Low             | Low                        | Low        | Low                |
| Ferguson 1999      | Low               | Low        | Unclear            | Low             | Low                        | Low        | Low                |
| Vogan 2000         | Low               | Low        | Unclear            | Low             | Low                        | Low        | Low                |
| Talbot 2001        | Low               | Low        | Unclear            | Low             | Low                        | Low        | Low                |
| Casiano 2001       | Low               | Low        | Low                | Low             | Low                        | Low        | Low                |
| Kountakis 2002     | Low               | Low        | Low                | Low             | Low                        | Low        | Low                |
| Joniau 2005        | Unclear           | Low        | Unclear            | Unclear         | Low                        | Low        | Low                |
| Kirtsreesakul 2005 | Low               | Low        | Low                | Low             | Low                        | Low        | Low                |
| Benninger 2006     | Low               | Low        | Unclear            | Unclear         | Low                        | Low        | Low                |
| Araujo 2007        | Unclear           | Low        | Unclear            | Unclear         | Low                        | Low        | Low                |
| Hsin 2008          | Low               | Low        | Low                | Low             | Low                        | Low        | Low                |
| Hsin 2010          | Low               | Low        | Unclear            | Low             | Low                        | Low        | Low                |
| Thunberg 2013      | Low               | Low        | Unclear            | Low             | Low                        | Low        | Low                |
| Szaleniec 2021     | Low               | Low        | Low                | Low             | Low                        | Low        | Low                |
